# Supplementary material for: Comparison of Ruptured Intracranial Aneurysms Identification Using Different Machine Learning Algorithms and Radiomics
Source: MDPI journal article supplement (doi:10.3390/diagnostics13162627), 2023-08-09
Supplement: s1 [file s1]

## **Supplementary Materials**

### **Inter-observer and intra-observer reproducibility analysis**

Inter-observer and intra-observer reproducibility analysis was performed on 50 patients randomly selected from center 1. The volume of interest (VOI) of each patient was semi-automatically segmented again by the same radiologist after the interval of 3 days and by another radiologist with the same method. After the extraction of radiomics features, the interclass correlation coefficient (ICC) was calculated to assess the reproducibility of radiomics features. The results showed that 99 (90.8%) radiomics features showed  $ICC > 0.8$  in the inter-observer reproducibility analysis and 101 (92.7%) radiomics features showed  $ICC > 0.8$  in the intra-observer reproducibility analysis.

### **Harmonization of Radiomics Features**

After radiomics features extraction, harmonization in the feature domain was performed. First, variables with zero variance were excluded from analyses, and the missing values were replaced by the median. Then the data were standardized by the standardization.

### **Definition of radiomics features**

The Skewness measures the asymmetry of the distribution of values about the Mean value. Depending on where the tail is elongated and the mass of the distribution is concentrated, this value can be positive or negative. The Elongation shows the relationship between the two largest principal components in the ROI shape. For computational reasons, this feature is defined as the inverse of true elongation. The values range between 1 (where the cross section through the first and second largest

principal moments is circle-like (non-elongated)) and 0 (where the object is a maximally elongated: i.e. a 1 dimensional line). The Maximum means the maximum gray level intensity within the ROI. The Cluster Shade is a measure of the skewness and uniformity of the GLCM. A higher cluster shade implies greater asymmetry about the mean. The Zone Percentage measures the coarseness of the texture by taking the ratio of number of zones and number of voxels in the ROI. And the Strength is a measure of the primitives in an image. Its value is high when the primitives are easily defined and visible, i.e. an image with slow change in intensity but larger coarse differences in gray level intensities.

### **A brief description of machine learning algorithms we adopted**

1. Support Vector Machine (SVM): SVM is a well-established algorithm for binary classification tasks. It works well with high-dimensional data like radiomics features and can handle non-linear relationships effectively.
2. Decision Tree: Decision trees are intuitive and easy to interpret, making them suitable for gaining insights into feature importance. Additionally, they are capable of handling non-linear relationships and interactions between features.
3. XGBoost (Extreme Gradient Boosting): XGBoost is a widely used ensemble learning technique known for its high predictive accuracy and ability to handle complex data relationships. It's especially effective for structured data like radiomics features.
4. Gaussian Naive Bayes (GNB): GNB is a probabilistic algorithm that performs well with small datasets and is particularly useful for problems with high-dimensional feature spaces.
5. Logistic Regression: Logistic regression is a common choice for binary classification tasks and serves as a baseline model due to its simplicity and interpretability.

6. Random Forest: Random forests are robust ensemble models that can capture complex interactions and reduce overfitting. They are suitable for high-dimensional feature sets.
7. k-Nearest Neighbors (KNN): KNN is a non-parametric algorithm that can be effective when there is a local structure in the data, making it useful for some medical imaging tasks.
8. Bagging Classifier: Bagging combines multiple models to reduce variance and improve generalization, making it suitable for enhancing the stability of decision trees.
9. AdaBoost: AdaBoost is an adaptive boosting algorithm that focuses on misclassified data points, which can be advantageous in improving the performance of weak learners like decision trees.
10. Gradient Boosting: Gradient boosting builds decision trees sequentially, each correcting the errors of its predecessor, making it powerful for capturing complex patterns in the data.
11. LightGBM (LGBM): LGBM is an efficient gradient boosting framework known for its high performance and speed, making it well-suited for large-scale datasets.
12. CatBoost: CatBoost is another gradient boosting algorithm that handles categorical features well and requires minimal data preprocessing.

**Table S1.** Characteristics of patients with intracranial aneurysm in the training and validation cohorts

| Variables                         | Training cohort<br>(n = 403) | Validation cohort<br>(n = 173) | <i>P</i> value |
|-----------------------------------|------------------------------|--------------------------------|----------------|
| Age, y, median [IQR]              | 63.0 [53.0, 71.0]            | 62.0 [52.0, 71.0]              | 0.694          |
| Gender                            |                              |                                | 0.645          |
| Male, n (%)                       | 165 (40.9)                   | 75 (43.4)                      |                |
| Female, n (%)                     | 238 (59.1)                   | 98 (56.5)                      |                |
| Hypertension history, n (%)       | 243 (60.3)                   | 103 (59.5)                     | 0.926          |
| aSAH history, n (%)               | 1 (0.2)                      | 0 (0)                          | 1.000          |
| Aneurysm size, mm, median [IQR]   | 3.2 [2.2, 4.8]               | 3.3 [2.4, 5.1]                 | 0.318          |
| PHASES, median [IQR]              | 2.0 [1.0, 4.0]               | 2.0 [1.0, 5.0]                 | 0.436          |
| Location                          |                              |                                | 0.810          |
| ICA, n (%)                        | 280 (69.5)                   | 119 (68.8)                     |                |
| ACA/ACOM, n (%)                   | 48 (11.9)                    | 24 (13.9)                      |                |
| MCA, n (%)                        | 48 (11.9)                    | 17 (9.8)                       |                |
| PCOM/Posterior circulation, n (%) | 27 (6.7)                     | 13 (7.5)                       |                |

Data are noted as mean and standard deviation, median and interquartile ranges or numbers and percentages in parenthesis. SD, standard deviation; aSAH, aneurysmal subarachnoid hemorrhage; ICA, internal carotid artery; ACA, Anterior cerebral artery; MCA, Middle cerebral artery; ACOM, anterior communicating artery; PCOM, posterior communicating artery.

**Table S2. The correlations of between the lesion volume and the seven radiomics features that we introduced into machine learning analysis.**

| Spearman                   | Correlation | original_firstord | original_firstord | original_glc | original_gldm     | original_glszm | original_ngtdm | original_shape |
|----------------------------|-------------|-------------------|-------------------|--------------|-------------------|----------------|----------------|----------------|
|                            |             | er_Maximum        | er_Skewness       | ClusterShade | DependenceEntropy | ZonePercentage | Strength       | Elongation     |
| original_shape_VoxelVolume | r           | 0.043             | 0.198**           | -0.497**     | -0.624**          | 0.983**        | -0.758**       | -0.426**       |
|                            | p value     | 0.308             | <0.001            | <0.001       | <0.001            | <0.001         | <0.001         | <0.001         |

**Table S3. The results of Delong test across 12 machine learning algorithms.**

| Models |         | RF      | SVM     | DT      | XGB     | GNB     | LR      | KNN     | BC      | AdaBoost | GB      | LGBM   | CatBoost |
|--------|---------|---------|---------|---------|---------|---------|---------|---------|---------|----------|---------|--------|----------|
| RF     | Z score | N/A     | -1.2405 | -2.9777 | -0.6513 | -0.8865 | -0.6158 | -1.8989 | -0.3735 | 2.8926   | 4.1510  | 0.2977 | 2.5722   |
|        | p       | N/A     | 0.2148  | 0.0029  | 0.5148  | 0.3754  | 0.5380  | 0.0576  | 0.7088  | 0.0038   | <0.0001 | 0.7659 | 0.0101   |
| SVM    | Z score | -1.2405 | N/A     | -1.6402 | 0.9362  | 0.3950  | 0.9798  | -1.0286 | 1.1441  | 3.4241   | 3.6297  | 1.6870 | 3.8472   |
|        | p       | 0.2148  | N/A     | 0.1010  | 0.3492  | 0.6929  | 0.3272  | 0.3037  | 0.2526  | 0.0006   | 0.0003  | 0.0916 | 0.0001   |
| DT     | Z score | -2.9777 | -1.6402 | N/A     | 2.6398  | 1.8507  | 2.0267  | 0.8395  | 3.0700  | 4.8704   | 4.8654  | 2.9567 | 4.1165   |
|        | p       | 0.0029  | 0.1010  | N/A     | 0.0083  | 0.0642  | 0.0427  | 0.4012  | 0.0021  | <0.0001  | <0.0001 | 0.0031 | <0.0001  |
| XGB    | Z score | -0.6513 | 0.9362  | 2.6398  | N/A     | -0.5092 | -0.2413 | -1.6637 | 0.2833  | 3.1625   | 4.5699  | 1.0154 | 3.1630   |
|        | p       | 0.5148  | 0.3492  | 0.0083  | N/A     | 0.6106  | 0.8093  | 0.0962  | 0.7770  | 0.0016   | <0.0001 | 0.3099 | 0.0016   |
| GNB    | Z score | -0.8865 | 0.3950  | 1.8507  | -0.5092 | N/A     | 0.5254  | -1.3084 | 0.6996  | 3.2812   | 3.3132  | 1.1532 | 3.3287   |
|        | p       | 0.3754  | 0.6929  | 0.0642  | 0.6106  | N/A     | 0.5993  | 0.1907  | 0.4842  | 0.0010   | 0.0009  | 0.2488 | 0.0009   |

|      |         |         |         |         |         |         |         |         |         |         |         |         |         |
|------|---------|---------|---------|---------|---------|---------|---------|---------|---------|---------|---------|---------|---------|
| LR   | Z score | -0.6158 | 0.9798  | 2.0267  | -0.2413 | 0.5254  | N/A     | -1.5049 | 0.4300  | 3.1052  | 3.1920  | 0.9177  | 3.3201  |
|      | p       | 0.5380  | 0.3272  | 0.0427  | 0.8093  | 0.5993  | N/A     | 0.1324  | 0.6672  | 0.0019  | 0.0014  | 0.3588  | 0.0009  |
| KNN  | Z score | -1.8989 | -1.0286 | 0.8395  | -1.6637 | -1.3084 | -1.5049 | N/A     | 1.9415  | 4.0109  | 3.9352  | 2.2890  | 3.9674  |
|      | p       | 0.0576  | 0.3037  | 0.4012  | 0.0962  | 0.1907  | 0.1324  | N/A     | 0.0522  | 0.0001  | 0.0001  | 0.0221  | 0.0001  |
| BC   | Z score | -0.3735 | 1.1441  | 3.0700  | 0.2833  | 0.6996  | 0.4300  | 1.9415  | N/A     | 3.0112  | 4.5211  | 0.7905  | 3.4924  |
|      | p       | 0.7088  | 0.2526  | 0.0021  | 0.7770  | 0.4842  | 0.6672  | 0.0522  | N/A     | 0.0026  | <0.0001 | 0.4292  | 0.0005  |
| ADA  | Z score | 2.8926  | 3.4241  | 4.8704  | 3.1625  | 3.2812  | 3.1052  | 4.0109  | 3.0112  | N/A     | -0.4099 | -2.6244 | -1.3121 |
|      | p       | 0.0038  | 0.0006  | <0.0001 | 0.0016  | 0.0010  | 0.0019  | 0.0001  | 0.0026  | N/A     | 0.6819  | 0.0087  | 0.1895  |
| GB   | Z score | 4.1510  | 3.6297  | 4.8654  | 4.5699  | 3.3132  | 3.1920  | 3.9352  | 4.5211  | -0.4099 | N/A     | -3.7544 | -1.5073 |
|      | p       | <0.0001 | 0.0003  | <0.0001 | <0.0001 | 0.0009  | 0.0014  | 0.0001  | <0.0001 | 0.6819  | N/A     | 0.0002  | 0.1317  |
| LGBM | Z score | 0.2977  | 1.6870  | 2.9567  | 1.0154  | 1.1532  | 0.9177  | 2.2890  | 0.7905  | -2.6244 | -3.7544 | N/A     | 2.8465  |
|      | p       | 0.7659  | 0.0916  | 0.0031  | 0.3099  | 0.2488  | 0.3588  | 0.0221  | 0.4292  | 0.0087  | 0.0002  | N/A     | 0.0044  |

|    |         |        |        |         |        |        |        |        |        |         |         |        |     |
|----|---------|--------|--------|---------|--------|--------|--------|--------|--------|---------|---------|--------|-----|
| CB | Z score | 2.5722 | 3.8472 | 4.1165  | 3.1630 | 3.3287 | 3.3201 | 3.9674 | 3.4924 | -1.3121 | -1.5073 | 2.8465 | N/A |
|    | p       | 0.0101 | 0.0001 | <0.0001 | 0.0016 | 0.0009 | 0.0009 | 0.0001 | 0.0005 | 0.1895  | 0.1317  | 0.0044 | N/A |

---

Abbreviations: RF, Random forest; SVM, support machine learning; DT, decision-making tree; XGB, eXtreme Gradient Boosting; GNB, Gaussian Naive Bayes; LR, Logistic regression; KNN, k-Nearest Neighbor; BC, Bagging Classifier; ADA, Adaboost; GB, Gradient boosting; LGBM, Light Gradient Boosting Machine; CB, Catboost.
